# Supplementary material
Source: PubMed Central journal article supplement (PMC5577984)
Supplement: NIHMS889408-supplement-supplement_1.pdf [file NIHMS889408-supplement-supplement_1.pdf]

**Supplemental Table 1. Risk of Hospitalization and Death with Heart Rate by Country (N=2,705)\***

| <b>Outcome</b>                           | <b>Events</b> | <b>Model<sup>†</sup><br/>HR (95%CI)</b> | <b>P-value</b> |
|------------------------------------------|---------------|-----------------------------------------|----------------|
| <b>Hospitalization</b>                   |               |                                         |                |
| Russia/Georgia                           | 384           | 1.03 (0.98, 1.08)                       | 0.19           |
| Americas                                 | 770           | 1.03 (1.00, 1.06)                       | 0.043          |
| <b>Hospitalization for Heart Failure</b> |               |                                         |                |
| Russia/Georgia                           | 26            | 1.12 (0.95, 1.32)                       | 0.16           |
| Americas                                 | 283           | 1.09 (1.04, 1.14)                       | <0.001         |
| <b>Death</b>                             |               |                                         |                |
| Russia/Georgia                           | 107           | 1.11 (1.02, 1.21)                       | 0.021          |
| Americas                                 | 261           | 1.10 (1.05, 1.16)                       | <0.001         |
| <b>Cardiovascular Death</b>              |               |                                         |                |
| Russia/Georgia                           | 86            | 1.20 (1.10, 1.32)                       | <0.001         |
| Americas                                 | 146           | 1.09 (1.02, 1.17)                       | 0.016          |

\*HR presented per 5-bpm increase.

†Adjusted for age, sex, race, smoking, systolic blood pressure, diabetes, body mass index, serum creatinine, angiotensin-converting enzyme inhibitors/angiotensin II receptor blockers, beta blockers, statin, randomization group, New York Heart Association Class, coronary heart disease, and stroke.

bpm=beats per minutes; CI=confidence interval; HR=hazard ratio.
